# Supplementary material
Source: MDPI journal article supplement (https://www.mdpi.com/2071-1050/14/5/2766)
Supplement: s1 [file s1]

## Supplementary Materials: Awareness Survey on South Korea's Health ODA

### S.1. Part 1: The Direction of Korean Health ODA

1. The government of Korea provides aid in various areas including public administration, education and transportation. Please mark the priority—ranked by 1st, 2nd and 3rd—by area, among the top 8 areas that the Korean government engages in as of 2020.

| Priority | Area                  |
|----------|-----------------------|
|          | Public administration |
|          | Education             |
|          | Transportation        |
|          | Agriculture/forestry  |
|          | Health                |
|          | Industrial energy     |
|          | Humanitarian aid      |
|          | Environment           |
|          | Public administration |

2. As of 2020, the government of Korea pledged 10.9% of total ODA budget to the health area. How do you view the importance of health ODA?

| Very low | Low | Average | High | Very high |
|----------|-----|---------|------|-----------|
|----------|-----|---------|------|-----------|

3. According to the 2020 Annual Implementation Plan, Korean government selected education, health and industrial development as the priority areas to support achieving the SDGs in developing countries. In particular, building health facilities for the vulnerable (women, children), developing medication and providing medical training to support meeting the SDG 3 (health) were mentioned in the plan. Do you think the government should maintain the current direction of health ODA?

| Response | Answer |
|----------|--------|
|          | Yes    |
|          | No     |

If the above answer needs to be revised (or expounded on), please describe your thoughts freely.

Response:

4. In your opinion, what should be the priority issue or problem that the Korean health ODA should focus on institutionally? Please freely describe a maximum of three agendas (example: developing holistic(inter-department) health ODA strategy, increasing health ODA percentage, resolving fragmentation of health ODA, connecting health ODA with other projects, increasing participation of the private sector (e.g., pharmaceutical companies), building capacity of the stakeholders, etc.).

(1)  
(2)  
(3)

5. The government of Korea currently offers various types of health ODA. What do you think is the most important reason for Korea to engage in health ODA? Please choose a maximum of three reasons for health ODA from below. If you'd like to add an alternative reason, please write it on the last row next to 'others'.

| Selection | Purpose                                                      |
|-----------|--------------------------------------------------------------|
|           | To improve the health sector of developing countries         |
|           | To answer the call for support from the developing countries |

|                                                                                     |
|-------------------------------------------------------------------------------------|
| Because of the ethical responsibility as a member of the global society             |
| To strengthen global health security                                                |
| To create profit by cooperating with Korean private sector                          |
| To protect health of the Korean citizens (through preventing global pandemic, etc.) |
| Others:                                                                             |

6. What do you think the most serious health problem of the developing nations is? Please write down a maximum of three issues.

(1)  
(2)  
(3)

7. What should be the direction of health ODA and what are the ways to maximize its effectiveness? Please express your thoughts freely.

Response:

### S.2. Part 2: Global Disease Eradication Fund (GDEF)

8. How familiar are you with Global Disease Eradication Fund?

|                     |              |         |          |               |
|---------------------|--------------|---------|----------|---------------|
| Not familiar at all | Not familiar | Neutral | Familiar | Very familiar |
|---------------------|--------------|---------|----------|---------------|

Based on the air ticket solidarity levy system, Global Disease Eradication Fund (GDEF) is charged for every international flight ticket departing from Korea. It contributes to the prevention and eradication of infectious disease in developing countries, as well as to the accomplishment of the Sustainable Development Goal (SDG) #3, Good Health and Well-Being.

GDEF is composed of three types of businesses. First, public-private partnership contributes to eradicating and preventing infectious diseases in developing countries in cooperation with diverse Non-Governmental Organizations that have expertise in project implementation at the community-level. Second, GDEF partners with international organizations that have expertise in infectious disease sector to eradicate and prevent such diseases in developing countries. Third, GDEF provides grant to Global Health Initiatives that have expertise in international disease eradication projects to prevent and fight against disease in developing countries.

Source: KOICA homepage (retrieved 2022.1.24.)

9. GDEF is composed of Δpublic-private partnership Δinternational organizations partnership Δglobal program. In your opinion, which type is the most important among the three? (Choose 1)

| Response<br>(Choose 1) | Type of Business                        |
|------------------------|-----------------------------------------|
|                        | International organizations partnership |
|                        | Global program                          |
|                        | Public-private partnership              |

10-1. Among the three types of programs/partnerships, which one should the Korean government expand support? Please rank the priority (1<sup>st</sup> to 3<sup>rd</sup>) on the table below [※ Attention: Please mark 1st, 2nd and 3rd, instead of choosing just 1].

| Rank priority | Type of Business                        |
|---------------|-----------------------------------------|
|               | International organizations partnership |
|               | Global program                          |
|               | Public-private partnership              |

10-2. What is the reason behind ranking the priorities as above? Please freely express your opinions regarding your choice.

Response:

11. The main health issues that GDEF focuses on are 1) three major infectious diseases (HIV/AIDS, TB, Malaria), 2) neglected tropical diseases and 3) water-borne diseases. In addition, GDEF supports eradicating emerging infectious diseases such as Ebola and MERS. What other health issues should the Korean government support in your opinion? Please express your thoughts freely.

Response:

12. Global program operated by GDEF supports global health initiatives such as Gavi, Global Fund and UNITAID. How familiar are you with the 6 global health initiatives below?

| Gavi (The Vaccine Alliance) |              |         |          |               |
|-----------------------------|--------------|---------|----------|---------------|
| Not familiar at all         | Not familiar | Neutral | Familiar | Very familiar |

| Global Financing Facility |              |         |          |               |
|---------------------------|--------------|---------|----------|---------------|
| Not familiar at all       | Not familiar | Neutral | Familiar | Very familiar |

| Global Fund (To Fight AIDS, TB and Malaria) |              |         |          |               |
|---------------------------------------------|--------------|---------|----------|---------------|
| Not familiar at all                         | Not familiar | Neutral | Familiar | Very familiar |

| Global Polio Eradication Initiative |              |         |          |               |
|-------------------------------------|--------------|---------|----------|---------------|
| Not familiar at all                 | Not familiar | Neutral | Familiar | Very familiar |

| CEPI (Coalition for Epidemic Preparedness Innovations) |              |         |          |               |
|--------------------------------------------------------|--------------|---------|----------|---------------|
| Not familiar at all                                    | Not familiar | Neutral | Familiar | Very familiar |

| UNITAID (International Drug Purchase Facility) |              |         |          |               |
|------------------------------------------------|--------------|---------|----------|---------------|
| Not familiar at all                            | Not familiar | Neutral | Familiar | Very familiar |

13-1. Among the six organizations above, which global health initiatives should the Korean government cooperate more closely and focus on? Please order them by priority (1st to 6th).

| Priority | Multilateral Health Organization                       |
|----------|--------------------------------------------------------|
|          | CEPI (Coalition for Epidemic Preparedness Innovations) |
|          | Gavi (The Vaccine Alliance)                            |

|                                                |
|------------------------------------------------|
| Global Financing Facility                      |
| Global Fund (To Fight AIDS, TB and Malaria)    |
| Global Polio Eradication Initiative            |
| UNITAID (International Drug Purchase Facility) |

13-2. What is the reason for you choosing the initiative with the highest priority?

Response:

14. GDEF currently supports global health initiatives dealing with HIV/AIDS, TB and malaria. Other than these, which diseases or health issues should the Korean government focus on?

Response:

- 15-1. The Korean government unilaterally imposes KRW 1000 on all seat classes on international flights. However, it is possible to differentiate the level of levy across seat classes up to KRW 10,000 according to Korea International Cooperation Agency (KOICA) Act. Certain developed nations adopt this type of policy. Do you agree to raising the current level of levy?

| Response | Answer |
|----------|--------|
|          | Yes    |
|          | No     |

- 15-2. (If responded “yes”) Which level of increase would you agree to for economy class seats?

| Less than KRW 2000 | Between KRW 2000–4000 | Between KRW 4000–6000 | Between KRW 6000–8000 | Between KRW 8000–10,000 |
|--------------------|-----------------------|-----------------------|-----------------------|-------------------------|
|                    |                       |                       |                       |                         |

- 15-3. (If responded “yes”) Which level of increase would you agree to for business/first class seats?

| Less than KRW 2000 | Between KRW 2000–4000 | Between KRW 4000–6000 | Between KRW 6000–8000 | Between KRW 8000–10,000 |
|--------------------|-----------------------|-----------------------|-----------------------|-------------------------|
|                    |                       |                       |                       |                         |

- 15-4. (If responded “no”) What is the reason for keeping the current level? Please express your thoughts freely.

Response:

16. Do you think there is a need for raising awareness among Korean ODA stakeholders? Please freely write down the reasons for your answer.

Response:

17. Do you think there is a need for raising awareness among the Korean public? Please freely write down the reasons for your answer.

Response:

18. Recently, the importance of global health cooperation and health security is emphasized due to COVID-19. In your opinion, would Korean citizens’ support for the below increase because of COVID-19?

| Increase health ODA |                |         |               |                       |
|---------------------|----------------|---------|---------------|-----------------------|
| Not at all          | Won’t increase | Neutral | Will increase | Will increase sharply |
|                     |                |         |               |                       |

| Increase support for multilateral health organizations (funds)<br>such as WHO, Global Fund, etc. |                |         |               |                       |
|--------------------------------------------------------------------------------------------------|----------------|---------|---------------|-----------------------|
| Not at all                                                                                       | Won't increase | Neutral | Will increase | Will increase sharply |

| Increase GDEF levy (for all seat classes) |                |         |               |                       |
|-------------------------------------------|----------------|---------|---------------|-----------------------|
| Not at all                                | Won't increase | Neutral | Will increase | Will increase sharply |

19-1. The financial source for GDEF comes from 1) departure fees (source from KRW 1000 imposed for all international tickets), 2) contribution from the government and 3) profit derived from fund operation. In the mid- to long-term, do you think COVID-19 will decrease the total amount of GDEF?

|            |    |         |     |                       |
|------------|----|---------|-----|-----------------------|
| Not at all | No | Neutral | Yes | Will decrease sharply |
|------------|----|---------|-----|-----------------------|

19-2. Why did you choose the above response?

Response:

20. Please freely express your thoughts regarding Korean ODA, GDEF and global health initiatives.

- Thank You -
